# Supplementary material
Source: PubMed Central journal article supplement (PMC7936280)
Supplement: pnas.2022133118.sapp.pdf [file pnas.2022133118.sapp.pdf]

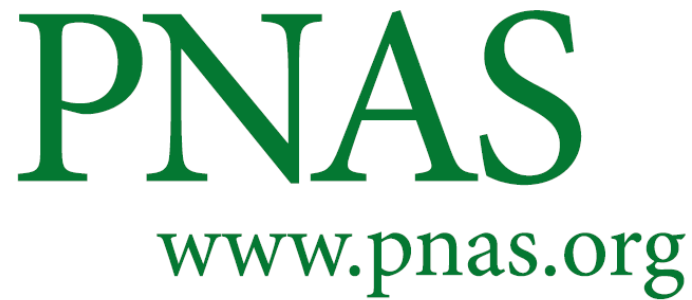

Supplementary Information for

**Unique dynamics and exocytosis properties of GABAergic  
synaptic vesicles revealed by three-dimensional single vesicle  
tracking**

Chungwon Park<sup>a</sup>, Xingxiang Chen<sup>a</sup>, Chong-Li Tian<sup>b, c</sup>, Gyu Nam Park<sup>d, e</sup>, Nicolas  
Chenouard<sup>f</sup>, Hunki Lee<sup>a, g</sup>, Xin Yi Yeo<sup>h, i</sup>, Sangyong Jung<sup>h, j</sup>, Richard W. Tsien<sup>k</sup>, Guo-  
Qiang Bi<sup>b, c</sup>, and Hyocheon Park<sup>a, l, m, 1</sup>

<sup>1</sup>Correspondence: Hyocheon Park  
Email: [hkpark@ust.hk](mailto:hkpark@ust.hk)

**This PDF file includes:**

Figures S1 to S3

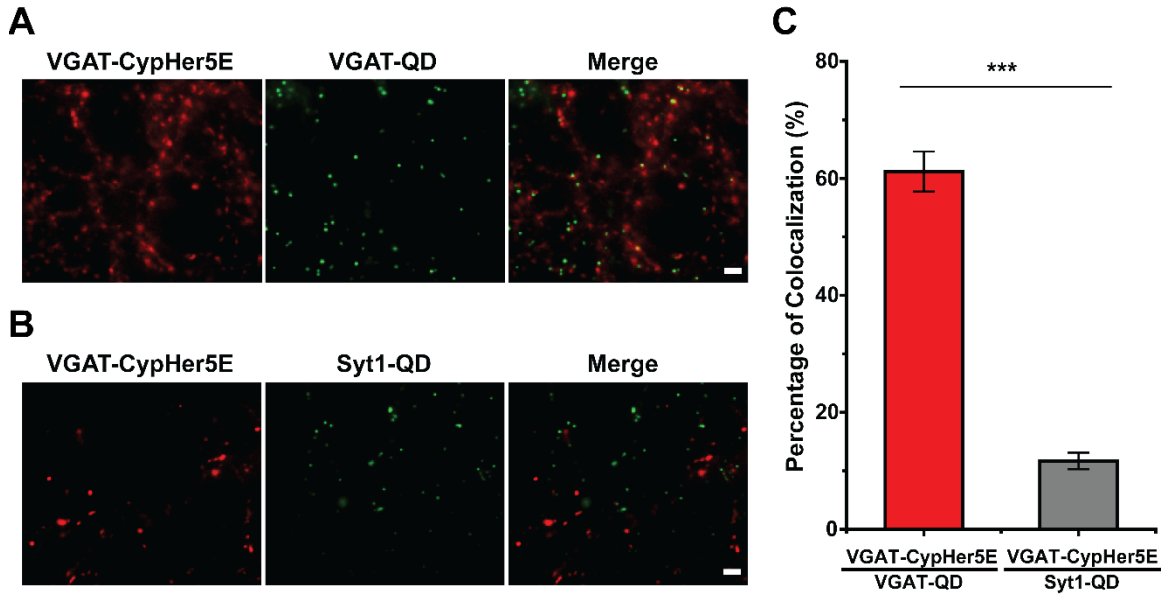

**Fig. S1. VGAT-QD preferentially labels GABAergic synaptic vesicles in cultured hippocampal neurons.** (A-B) Representative fluorescence images of GABAergic presynaptic terminals labeled with CypHer5E-conjugated antibodies against the luminal domain of VGAT (VGAT-CypHer5E, red) and synaptic vesicles loaded with QDs conjugated to antibodies against the luminal domain of VGAT (VGAT-QD, green; A) or antibodies against the luminal domain of Syt1 (Syt1-QD, green; B). Scale bars: 3  $\mu$ m. (C) Percentage of colocalization between VGAT-CypHer5E-labeled boutons and either VGAT-QD-loaded vesicles ( $61 \pm 3.4\%$  (N = 13 images)) or Syt1-QD-loaded vesicles ( $12 \pm 1.4\%$  (N = 13)). Error bars show SEM. \*\*\* $P < 0.001$  (Student's  $t$ -test).

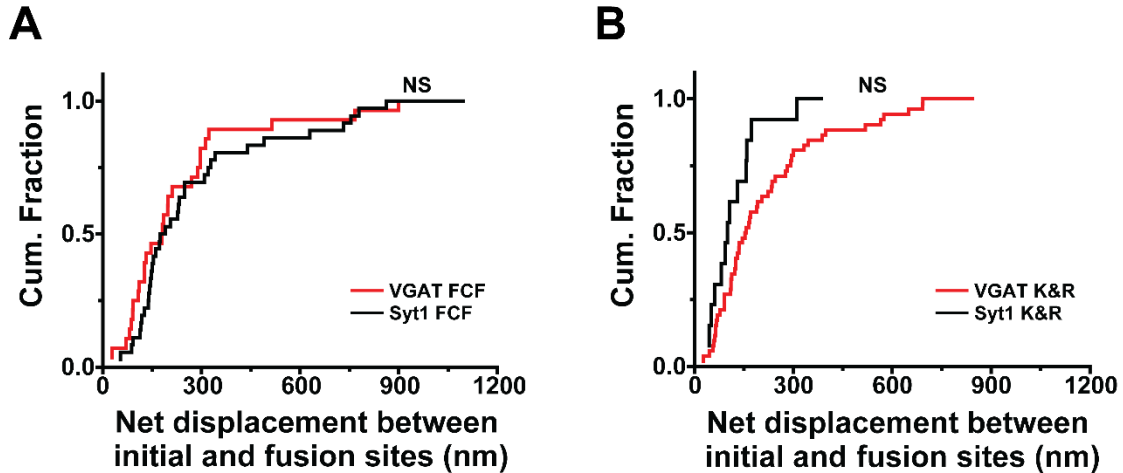

**Fig. S2. Cumulative distribution of net displacement of VGAT-QD-loaded and Syt1-QD-loaded synaptic vesicles undergoing either full-collapse fusion or kiss-and-run fusion. (A)** Cumulative distribution of net displacement of VGAT-QD-loaded vesicles and Syt1-QD-loaded vesicles undergoing full-collapse fusion. The net displacement of VGAT-labeled synaptic vesicles undergoing full-collapse fusion (VGAT FCF) was not significantly different from that of Syt1-labeled vesicles undergoing full-collapse fusion (Syt1 FCF) ( $260 \pm 46$  nm ( $n = 28$  vesicles) vs.  $302 \pm 43$  nm ( $n = 36$ ), respectively;  $P > 0.4$ , K-S test). **(B)** Cumulative distribution of net displacement of VGAT-QD-loaded vesicles and Syt1-QD-loaded vesicles undergoing kiss-and-run fusion. The net displacement of VGAT-labeled synaptic vesicles undergoing kiss-and-run fusion (VGAT K&R) was not significantly different from that of Syt1-labeled vesicles undergoing kiss-and-run fusion (Syt1 K&R) ( $231 \pm 27$  nm ( $n = 52$ ) vs.  $143 \pm 28$  nm ( $n = 13$ ), respectively;  $P > 0.3$ , K-S test). NS: not significant.

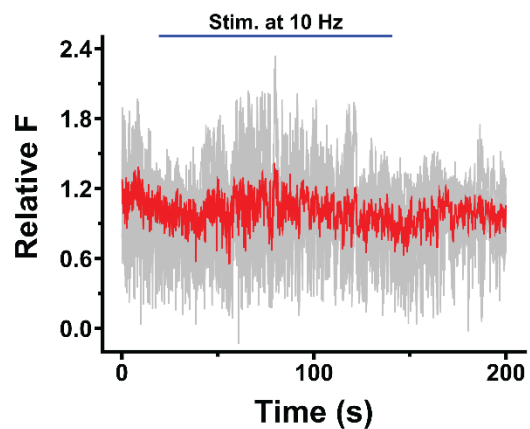

**Fig. S3. Normalized fluorescence traces of non-releasing VGAT-QD-loaded vesicles.** Five individual traces are shown in gray, and the average trace is shown with a red line. A blue horizontal bar represents electrical stimuli (10 Hz) for 120 s starting at 20 s.
